# Supplementary material
Source: PubMed Central journal article supplement (PMC3436200)

FIGURE S1

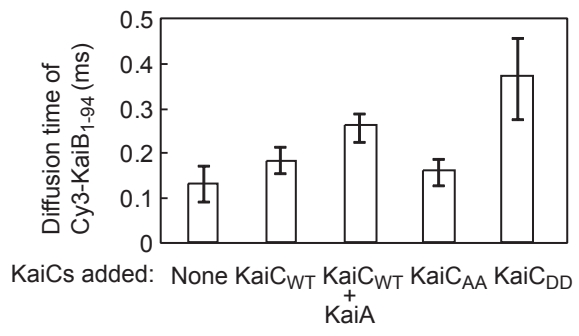

Supplement: supp_M112.349092_jbc.M112.349092-2.pdf [file supp_M112.349092_jbc.M112.349092-2.pdf]

FIGURE S2

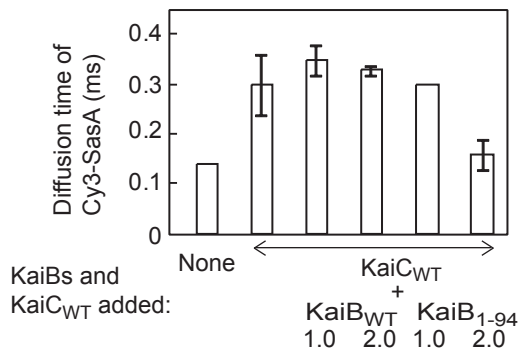

Supplement: supp_M112.349092_jbc.M112.349092-3.pdf [file supp_M112.349092_jbc.M112.349092-3.pdf]

FIGURE S3

A

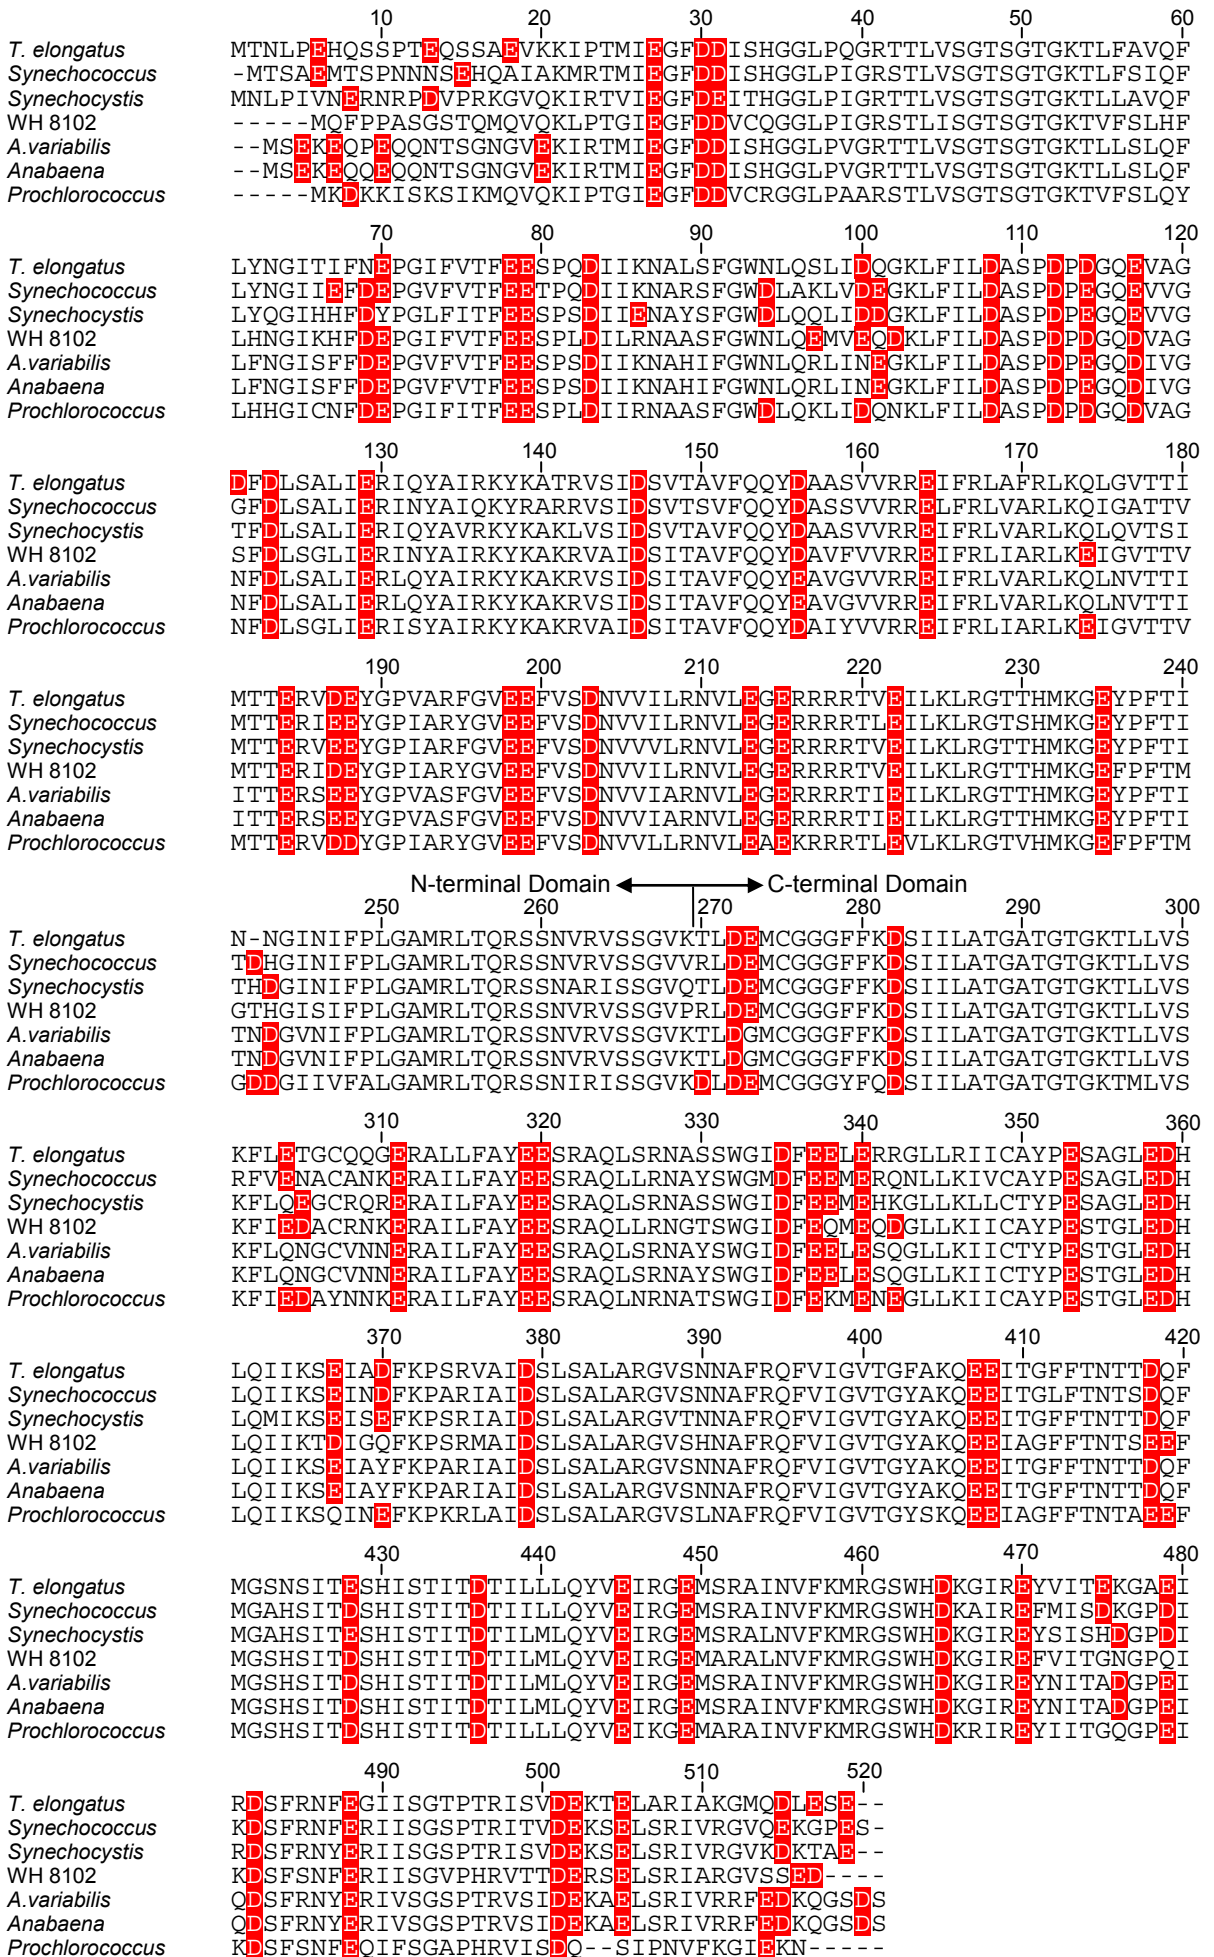

Supplement: supp_M112.349092_jbc.M112.349092-4.pdf [file supp_M112.349092_jbc.M112.349092-4.pdf]

FIGURE S3

B

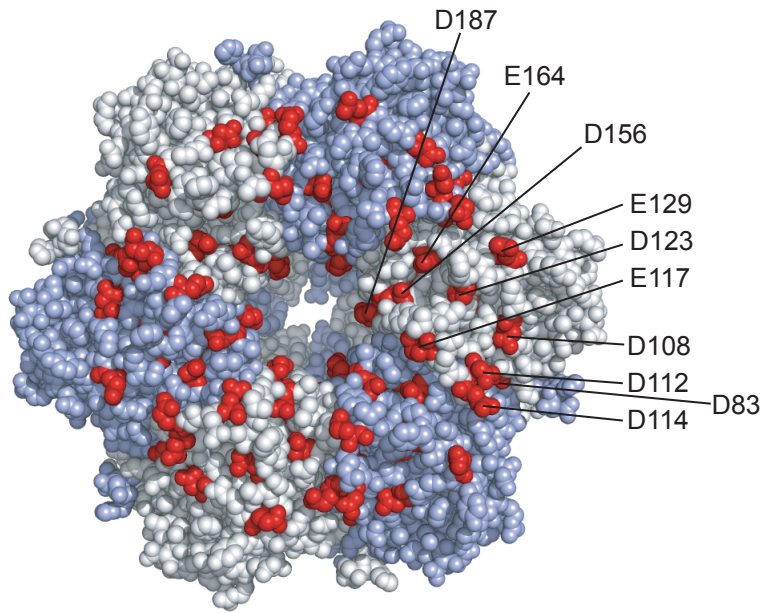

C

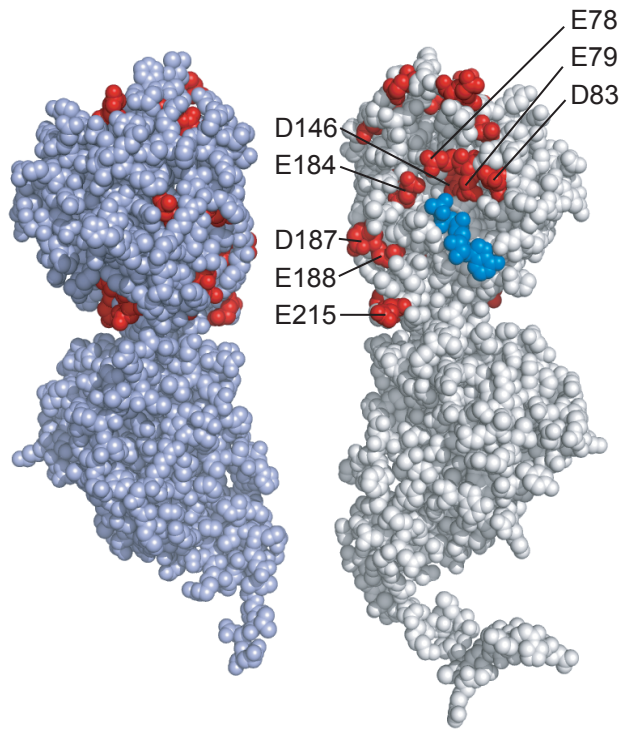

Supplement: supp_M112.349092_jbc.M112.349092-5.pdf [file supp_M112.349092_jbc.M112.349092-5.pdf]
